# Supplementary material
Source: Springer Nature journal article supplement (https://www.springermedizin.de/resource/supplementary/12943_2013_1236_MOESM6_ESM.pdf/9552680)

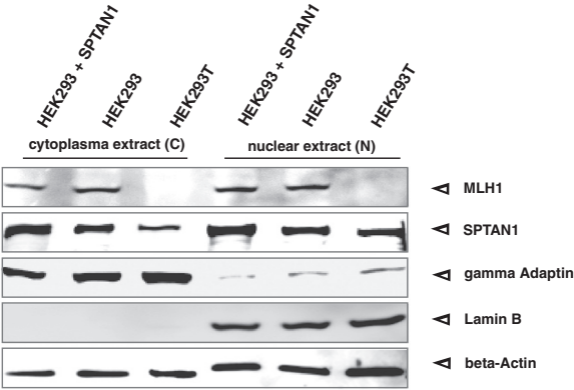

Supplement: MOESM6 [file 9552680]
